# Supplementary material for: Temperature dependence of the photo- and electroluminescence of poly(p-phenylene vinylene) based polymers
Source: Royal Society of Chemistry journal article supplement (doi:10.1039/c8tc01998c), 2018-01-01
Supplement: c8tc01998c1.pdf [file c8tc01998c1.pdf]

Supporting Information

for

**Temperature dependence of photo- and electroluminescence of poly(*p*-phenylene vinylene) based polymers**

Irina Rörich,<sup>a,b</sup> Ann-Kathrin Schönbein,<sup>a</sup> Deepthi Kamath Mangalore,<sup>a</sup> Anielen Halda Ribeiro,<sup>a</sup> Christian Kasperek,<sup>a</sup> Christian Bauer,<sup>a</sup> N. Irina Crăciun,<sup>a</sup> Paul W. M. Blom,<sup>a</sup> and Charusheela Ramanan\*<sup>a</sup>

---

<sup>a</sup>Max Planck Institute for Polymer Research, Ackermannweg 10, 55128 Mainz, Germany

<sup>b</sup>Dutch Polymer Institute, P.O. Box 902, 5600 AX Eindhoven, The Netherlands.

---

E-mail: ramanan@mpip-mainz.mpg.de

Table S1. Photoluminescence spectra peaks of SY-PPV determined by Gaussian fits.

| T (K) | S <sub>0,0</sub> (nm) | S <sub>0,1</sub> (nm) | S <sub>0,2</sub> (nm) |
|-------|-----------------------|-----------------------|-----------------------|
| 290   | 537                   | 580                   | 615                   |
| 270   | 539                   | 581                   | 612                   |
| 230   | 541                   | 583                   | 622                   |
| 200   | 542                   | 583                   | 624                   |
| 180   | 544                   | 586                   | 635                   |
| 150   | 547                   | 589                   | 638                   |
| 130   | 547                   | 589                   | 635                   |
| 100   | 550                   | 593                   | 635                   |
| 77    | 550                   | 593                   | 636                   |

Table S2. Photoluminescence spectra peaks of BEH-PPV determined by Gaussian fits.

| T (K) | S <sub>0,0</sub> (nm) | S <sub>0,1</sub> (nm) | S <sub>0,2</sub> (nm) |
|-------|-----------------------|-----------------------|-----------------------|
| 290   | 588                   | 629                   | 677                   |
| 270   | 590                   | 632                   | 679                   |
| 230   | 594                   | 636                   | 692                   |
| 180   | 598                   | 642                   | 699                   |
| 150   | 600                   | 645                   | 705                   |
| 120   | 603                   | 650                   | 713                   |
| 90    | 604                   | 652                   | 717                   |
| 77    | 605                   | 653                   | 718                   |

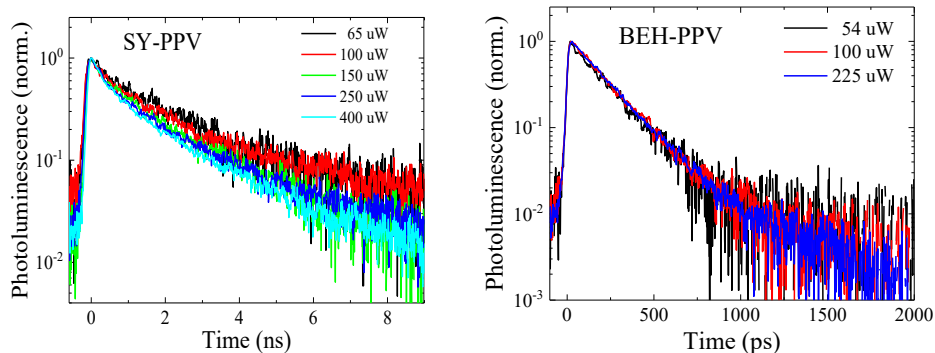

Figure S1. Room temperature time-resolved photoluminescence kinetics of SY-PPV (monitored at 550 nm) and BEH-PPV at (monitored at 600 nm) with varying photoexcitation power.

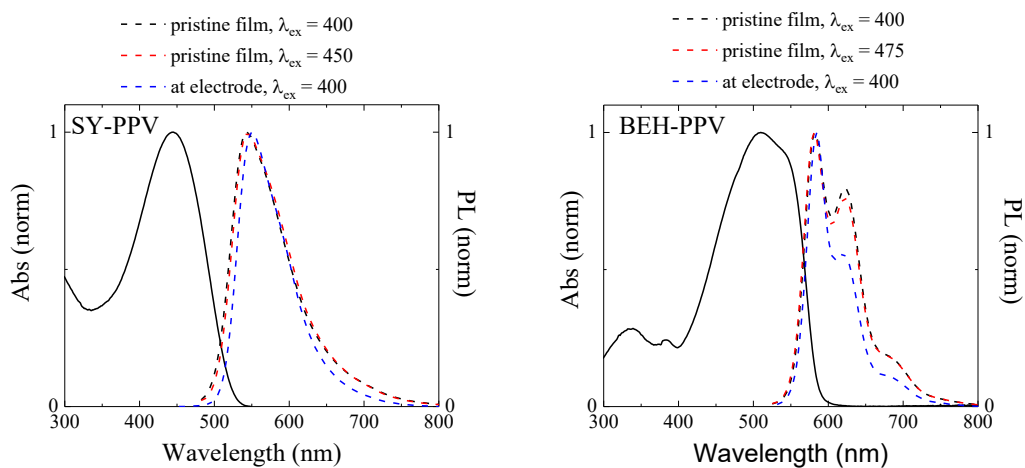

Figure S2. Steady-state absorption (solid) and photoluminescence (dashed) spectra of SY-PPV and BEH-PPV films on quartz. Photoluminescence of the pristine film measured at different excitation wavelengths (indicated in the legend) exhibit the same lineshape. Photoluminescence measured at the electrode (dashed blue) in the PLED stack indicate the light out-coupling effect due to the (partially) reflective electrodes.

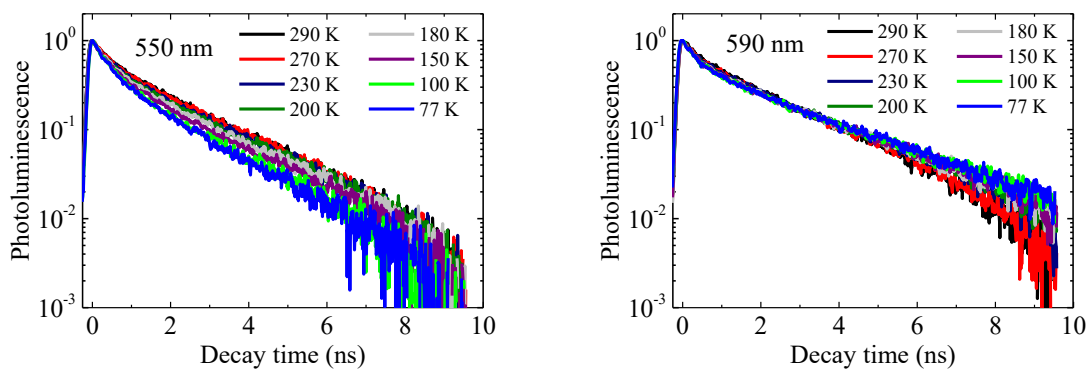

Figure S3. Normalized PL decays in SY-PPV for a wide temperature-range.

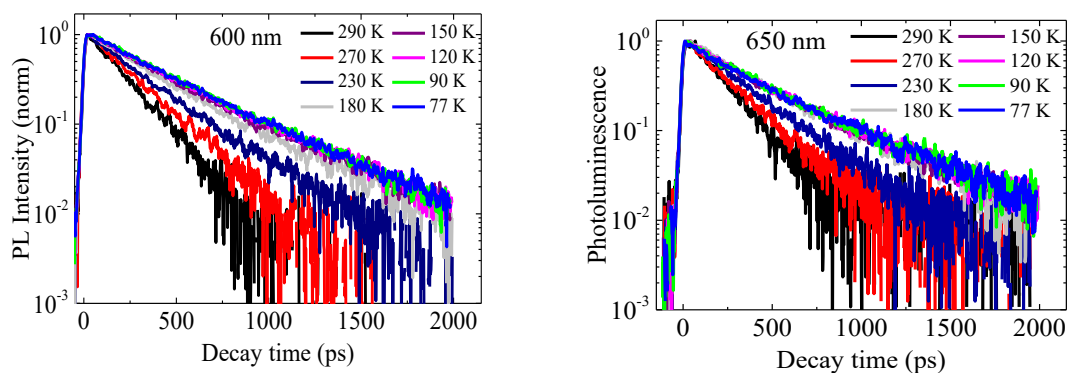

Figure S4. Normalized PL decays in BEH-PPV for a wide temperature-range.

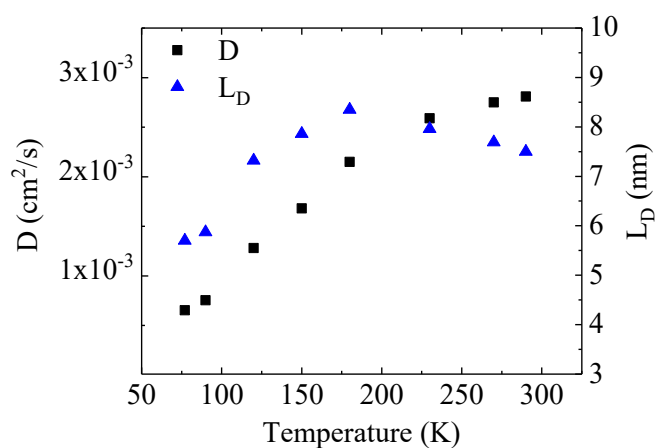

Figure S5. Temperature-dependence of exciton diffusion coefficient  $D$  (black squares) and diffusion length  $L_D$  (blue triangles) for BEH-PPV, determined from monoexponential fits to time-resolved fluorescence quenching experiments and Stern-Volmer equation.

Table S3: Temperature-dependent exciton diffusion coefficients and diffusion lengths for SY-PPV (left) and BEH-PPV (right).

| T (K) | $D_{\text{SY-PPV}}$<br>( $\text{cm}^2/\text{s}$ ) | $L_{\text{D,SY-PPV}}$<br>(nm) | $D_{\text{BEH-PPV}}$<br>( $\text{cm}^2/\text{s}$ ) | $L_{\text{D,BEH-PPV}}$<br>(nm) |
|-------|---------------------------------------------------|-------------------------------|----------------------------------------------------|--------------------------------|
| 290   | $3.1 \times 10^{-4}$                              | 7.7                           | $2.9 \times 10^{-3}$                               | 7.7                            |
| 270   | $2.1 \times 10^{-4}$                              | 6.5                           | $3.1 \times 10^{-3}$                               | 8.5                            |
| 230   | $1.4 \times 10^{-4}$                              | 5.4                           | $3.0 \times 10^{-3}$                               | 9.3                            |
| 200   | $9.4 \times 10^{-5}$                              | 4.5                           | <i>(not measured)</i>                              |                                |
| 180   | $8.0 \times 10^{-5}$                              | 4.2                           | $2.5 \times 10^{-3}$                               | 9.6                            |
| 150   | $6.5 \times 10^{-5}$                              | 3.8                           | $2.2 \times 10^{-3}$                               | 9.2                            |
| 120   | $6.6 \times 10^{-5}$                              | 3.9                           | $2.0 \times 10^{-3}$                               | 8.9                            |
| 90    | $7.1 \times 10^{-5}$                              | 4.0                           | $8.3 \times 10^{-4}$                               | 5.5                            |
| 77    | $6.8 \times 10^{-5}$                              | 4.0                           | $6.8 \times 10^{-4}$                               | 5.2                            |

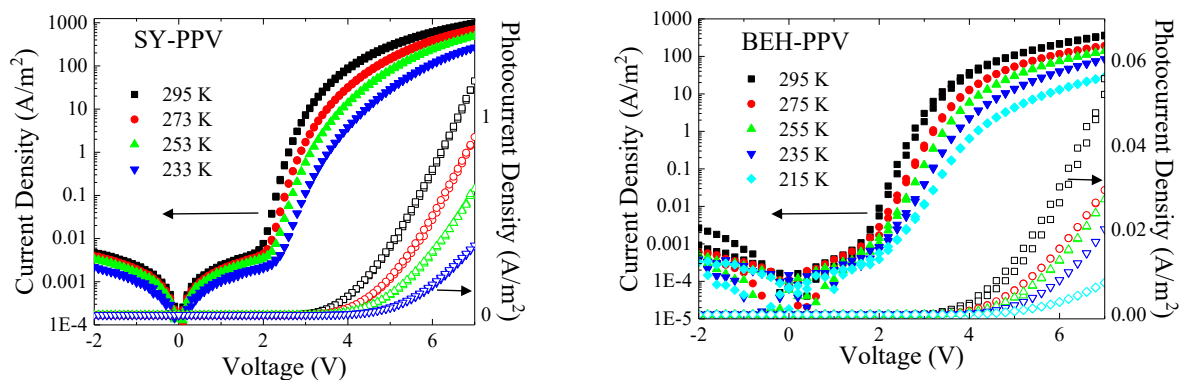

Figure S7. Temperature dependent current density and photocurrent density for SY-PPV and BEH-PPV PLEDs.

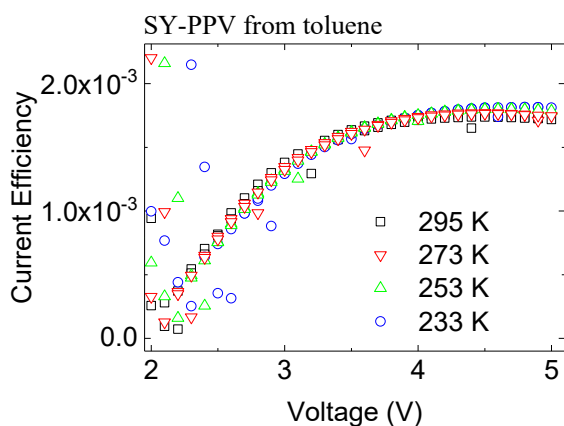

Figure S6. Current efficiency vs. voltage for SY-PPV PLED fabricated from toluene, measured at various temperatures.

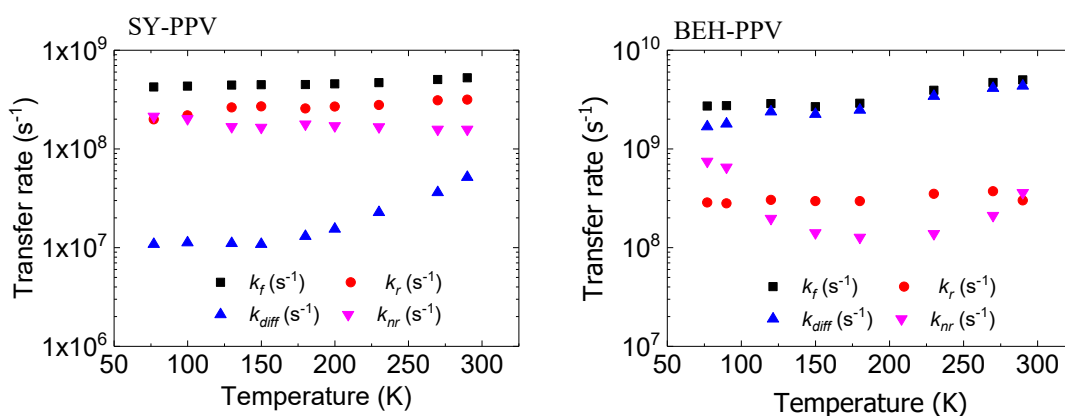

Figure S8. Exciton transfer rates in SY-PPV and BEH-PPV films. The exact values are summarized in Tables 3 and 4.
